# Supplementary material for: Structural Study of Sulfur-Added Carbon Nanohorns
Source: MDPI journal article supplement (doi:10.3390/ma15103412), 2022-05-10
Supplement: s1 [file s1]

# Structural Study of Sulfur-Added Carbon Nanohorns

**Ysmael Verde-Gómez <sup>1,\*</sup>, Elizabeth Montiel-Macías <sup>1</sup>, Ana María. Valenzuela-Muñiz <sup>1</sup>, Ivonne Alonso-Lemus <sup>2</sup>, Mario Miki-Yoshida <sup>3</sup>, Karim Zaghib <sup>4</sup>, Nicolas Brodusch <sup>5</sup> and Raynald Gauvin <sup>5</sup>**

<sup>1</sup> Tecnológico Nacional de México/I.T. de Cancún, Av. Kabah km. 3, Cancún, Q.Roo, 77500, México; elizabethmontielmacias@hotmail.com (E.M.-M.); ana.vm@cancun.tecnm.mx (A.M.V.-M.)

<sup>2</sup> CONACyT-CINVESTAV Unidad Saltillo, Sustentabilidad de los Recursos Naturales y Energía. Av. Industria Metalúrgica, Parque Industrial Saltillo-Ramos Arizpe, Ramos Arizpe, Coah., 25900, México; ivonne.alonso@cinvestav.edu.mx

<sup>3</sup> Centro de Investigación en Materiales Avanzados S.C., Av. Miguel de Cervantes 120, Chihuahua, Chih., 31136, México; mario.miki@cimav.edu.mx

<sup>4</sup> Department of Chemical and Materials Engineering, Concordia University, 1515 Rue Sainte-Catherine O, Montréal, QC H3G 2W1, Canada; karim.zaghib@concordia.ca

<sup>5</sup> Department of Mining and Materials Engineering, McGill University, 3610 University Street, Montréal, QC H3A 0C5, Canada; nicolas.brodusch@mcgill.ca (N.B.); raynald.gauvin@mcgill.ca (R.G.)

\* Correspondence: jose.vg@cancun.tecnm.mx; Tel.: +52-998-880-7432

## S1. EDS Results

**Table S1.** Elemental Analysis (EDS) from the Bulk of the Carbon Nanohorns.

| SAMPLE | wt. % |      |     |      |     |
|--------|-------|------|-----|------|-----|
|        | C     | Fe   | S   | O    | N   |
| SCNA8  | 80.0  | 8.7  | 0.3 | 7.5  | 3.3 |
| SCNB8  | 77.9  | 6.5  | 0.3 | 12.7 | 2.7 |
| SCNA9  | 84.9  | 5.1  | 1.1 | 6.0  | 3.4 |
| SCNB9  | 81.6  | 11.0 | 1.0 | 6.2  | 0   |

## S2. High-Resolution Scanning Electron Microscopy and Microanalysis

Figures S1 to S4 show the HRSEM micrographs of each sample using different detectors. The horn-like structures, the two layers, and iron nanoparticles (white spots in the backscattering images) can be appreciated in all samples.

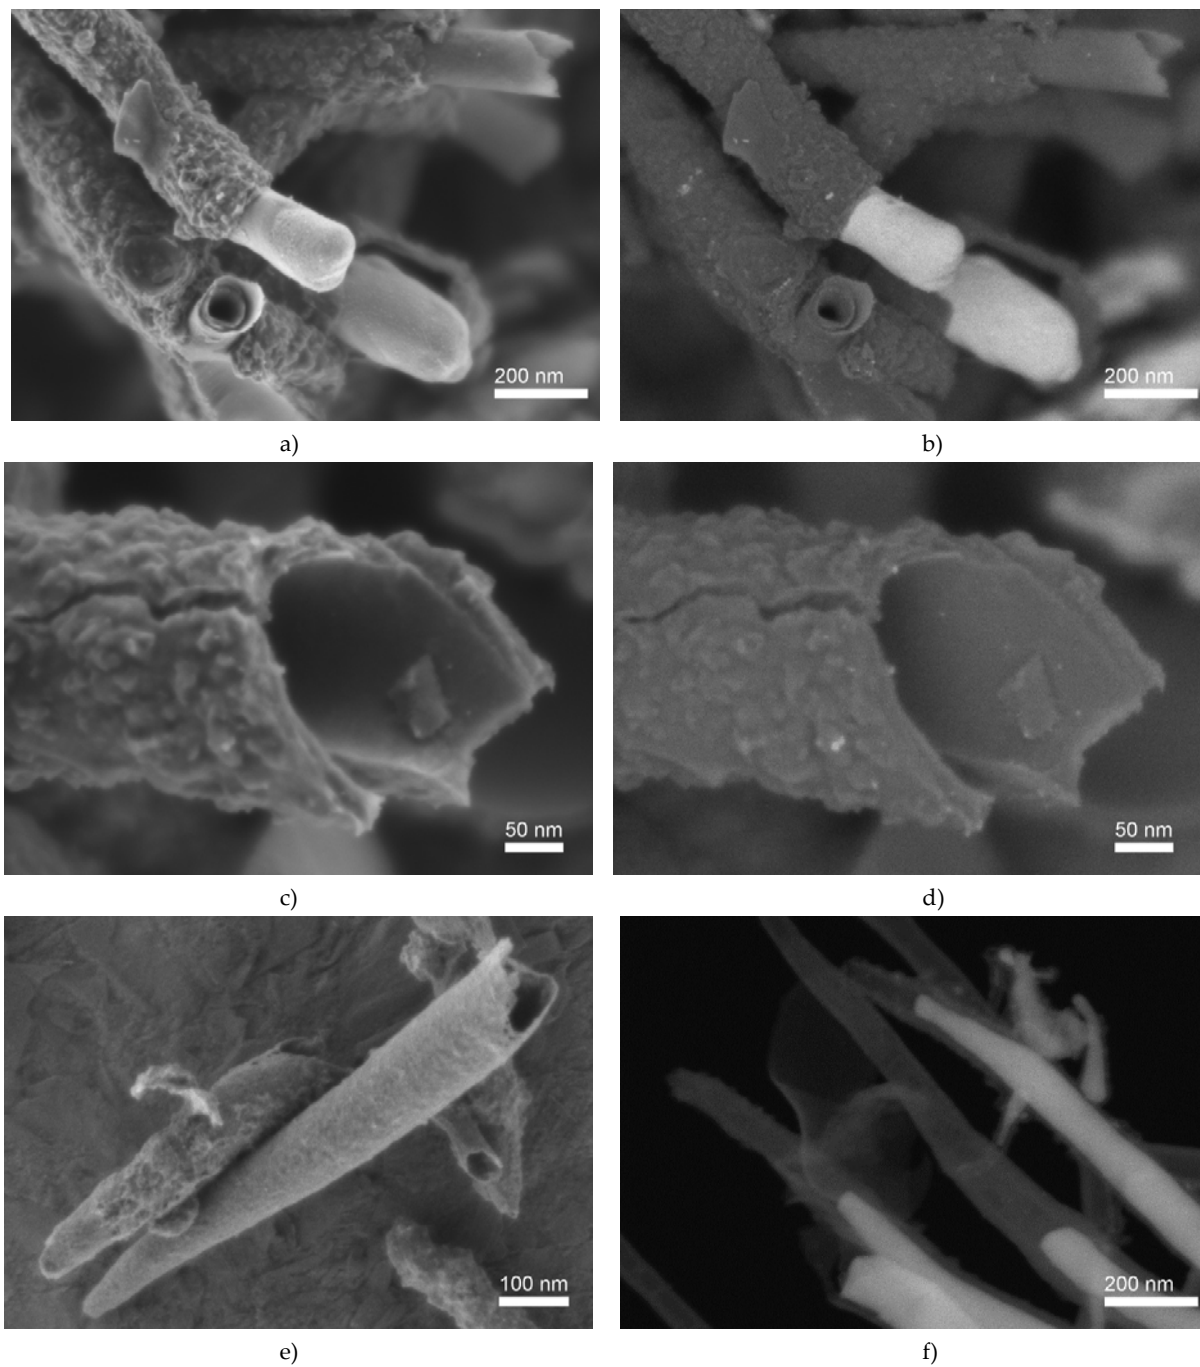

**Figure S1.** High-resolution scanning electron microscopy micrographs of the SCNA8 sample using the upper secondary electrons detector (Figures a, c and e) and top energy-filtered backscattered electrons (Figures b and d) in-lens detectors at  $E_0 = 0.5$  kV (a-d) and  $E_0 = 0.2$  kV (e); and a dark-field transmitted electron detector (STEM-DF) at  $E_0 = 30$  kV (f).

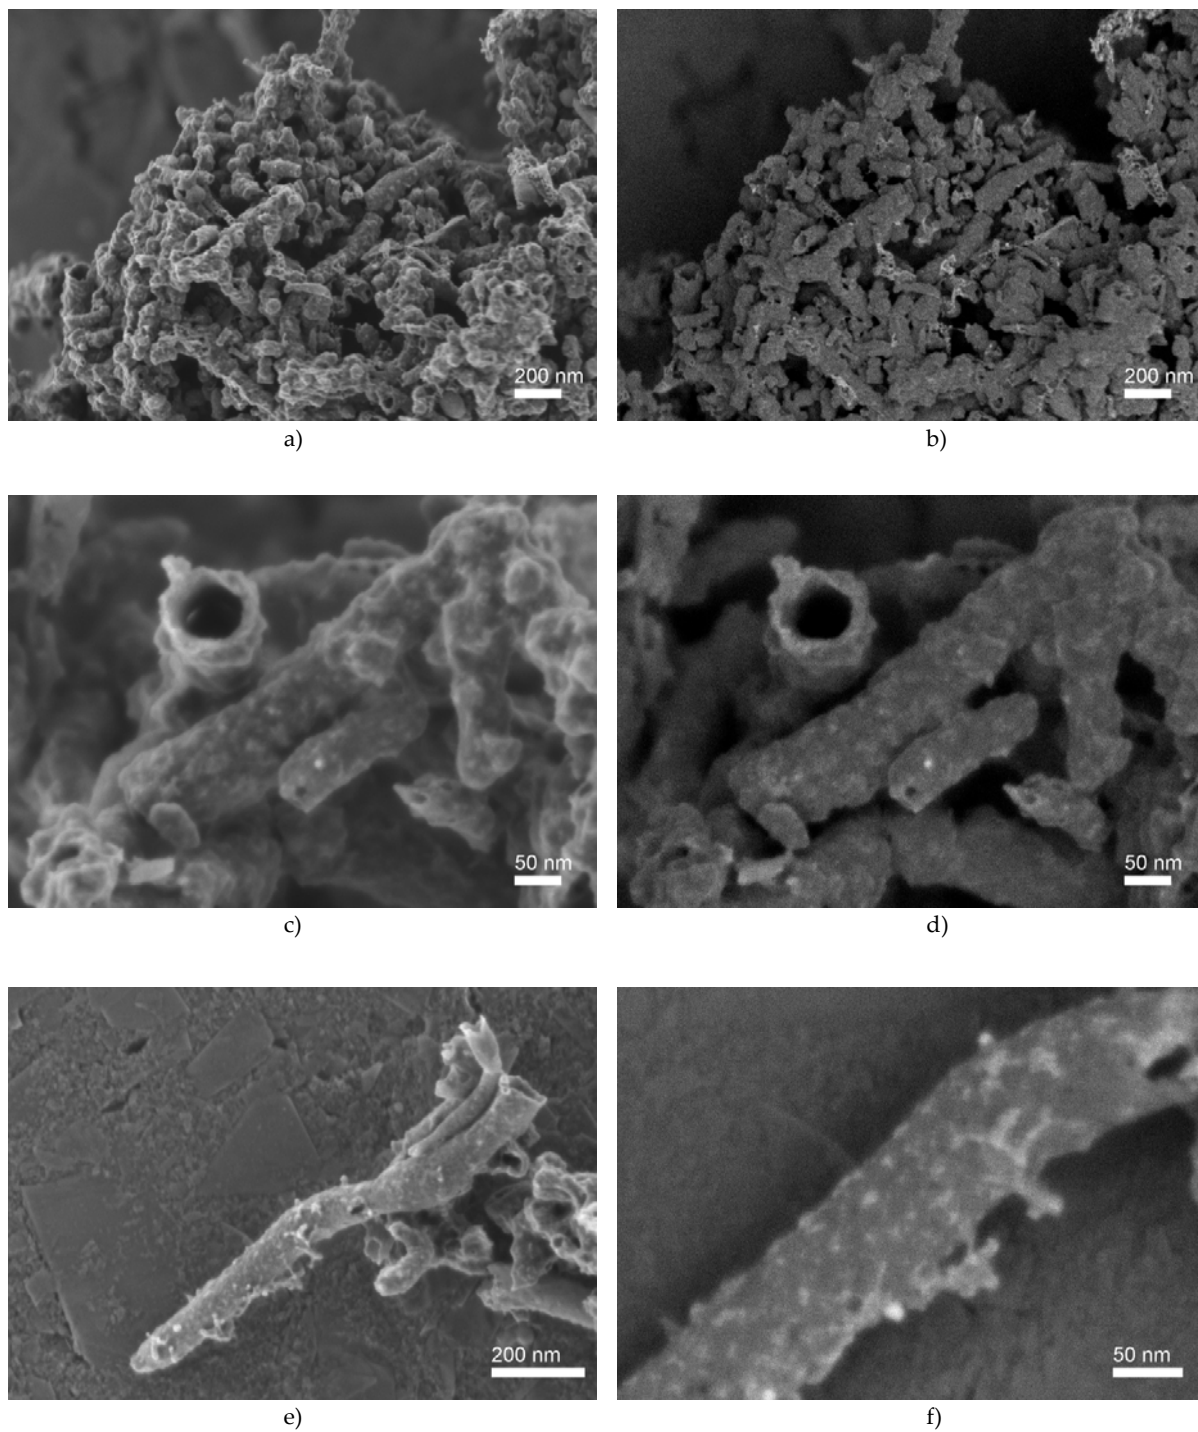

**Figure S2.** High-resolution scanning electron microscopy micrographs of the SCNB8 sample using the upper (secondary electrons, a, c, and e) and top (energy-filtered backscattered electrons, b, d, and f) in-lens detectors at  $E_0 = 0.5$  kV.

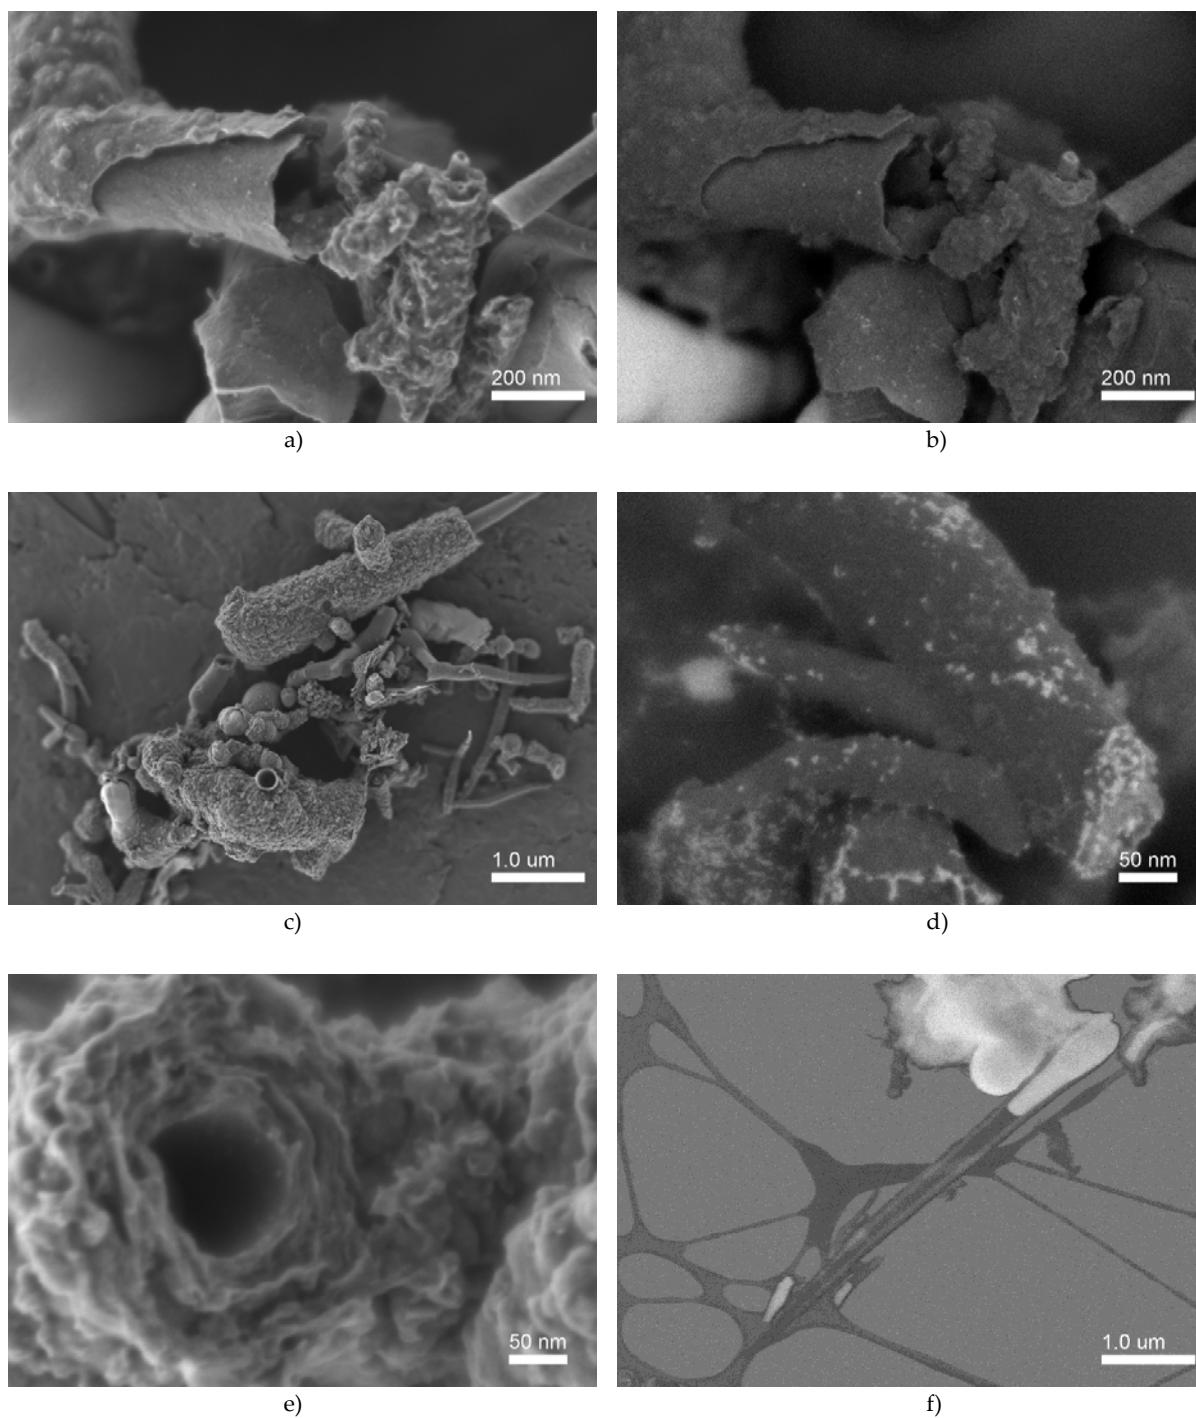

**Figure S3.** High-resolution scanning electron microscopy micrographs of the SCNA9 sample using the upper (secondary electrons, a, c, and e) and top (energy-filtered backscattered electrons, b, and d) in-lens detectors at  $E_0 = 0.5$  kV, and a dark-field transmitted electron detector (STEM-DF) at  $E_0 = 30$  kV (f).



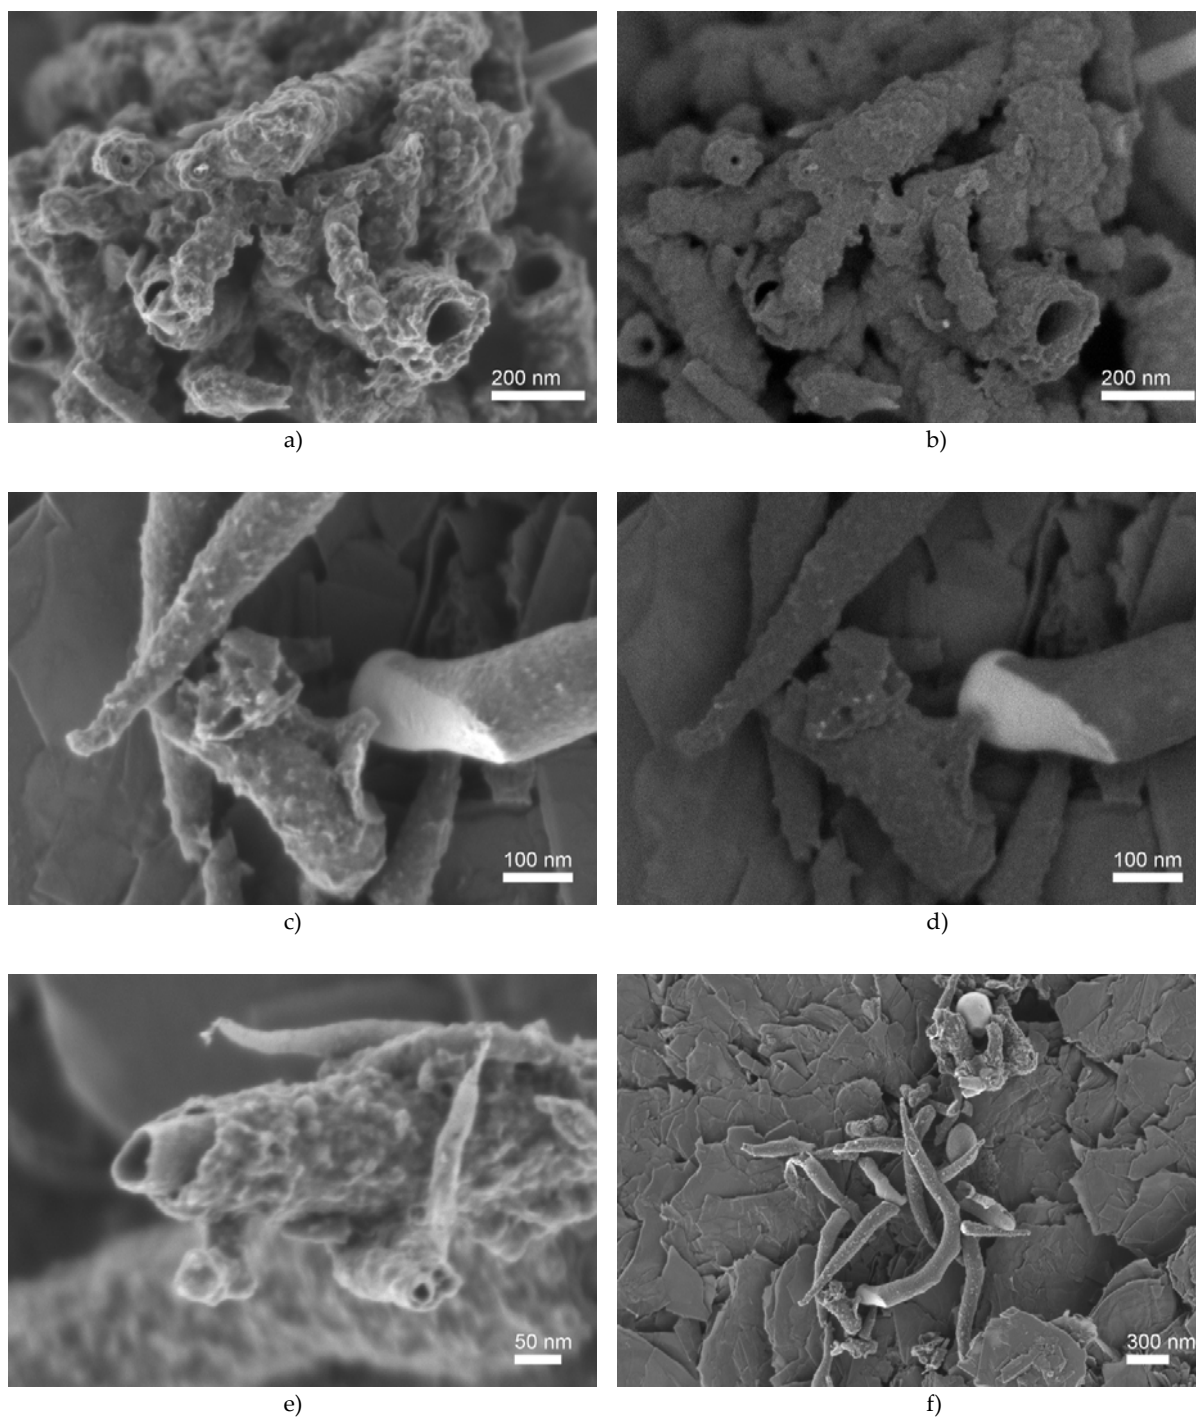

**Figure S4.** High-resolution scanning electron microscopy micrographs of the SCNB9 sample. using the upper (secondary electrons, a, c, e, and f) and top (energy-filtered backscattered electrons, b and d) in-lens detectors at  $E_0 = 0.5$  kV.

In Figure S5, X-ray microanalysis mapping using FlatQuad EDS detector exhibit the presence of iron, carbon, and sulfur in the core of the nanohorns, suggesting the formation of iron sulfide, and iron carbide; consistent with XRD patterns.

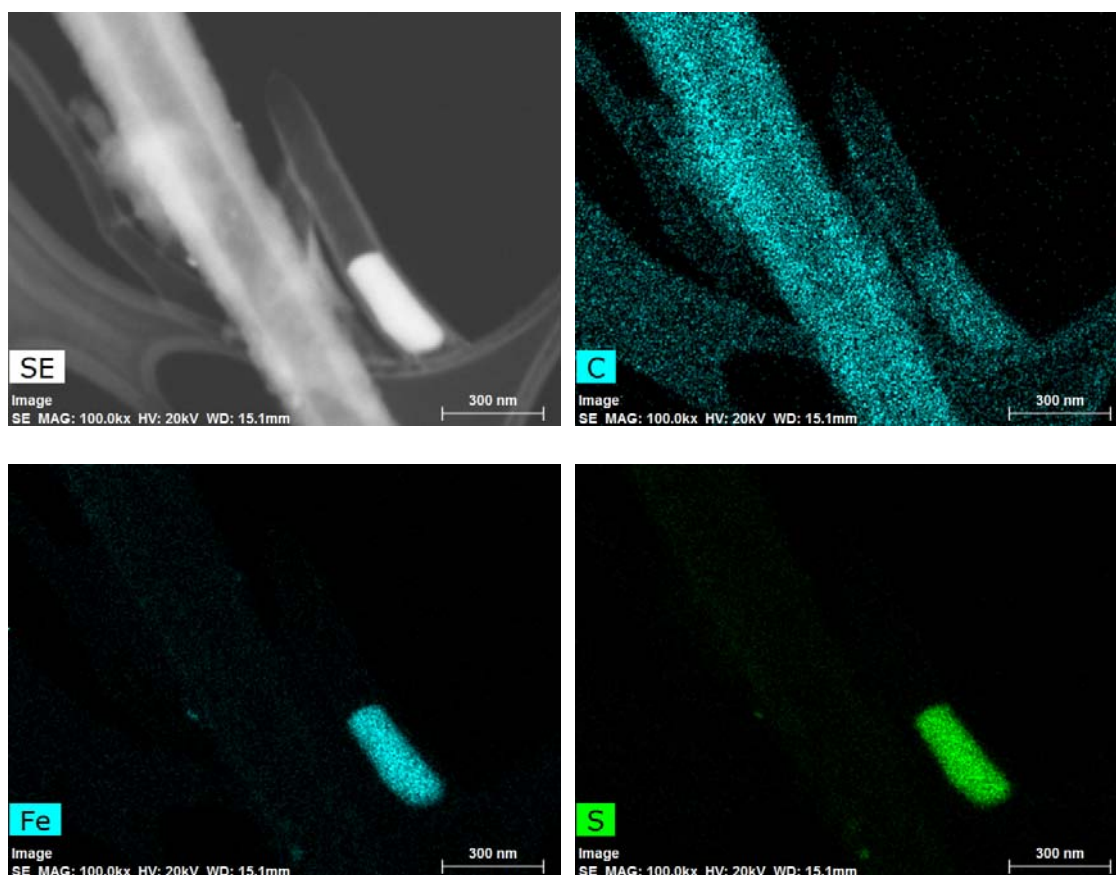

**Figure S5.** Elemental X-Ray map of SCNA9 sample in STEM mode at  $E_0 = 20$  kV.
